# Supplementary material for: Oxidative phosphorylation and lacunar stroke: Genome-wide enrichment analysis of common variants
Source: PubMed Central journal article supplement (PMC4731691; doi:10.1212/wnl.0000000000002260), 2016-01-12

**Figure e-1.** Plots of the p-values in gene regions by genomic position

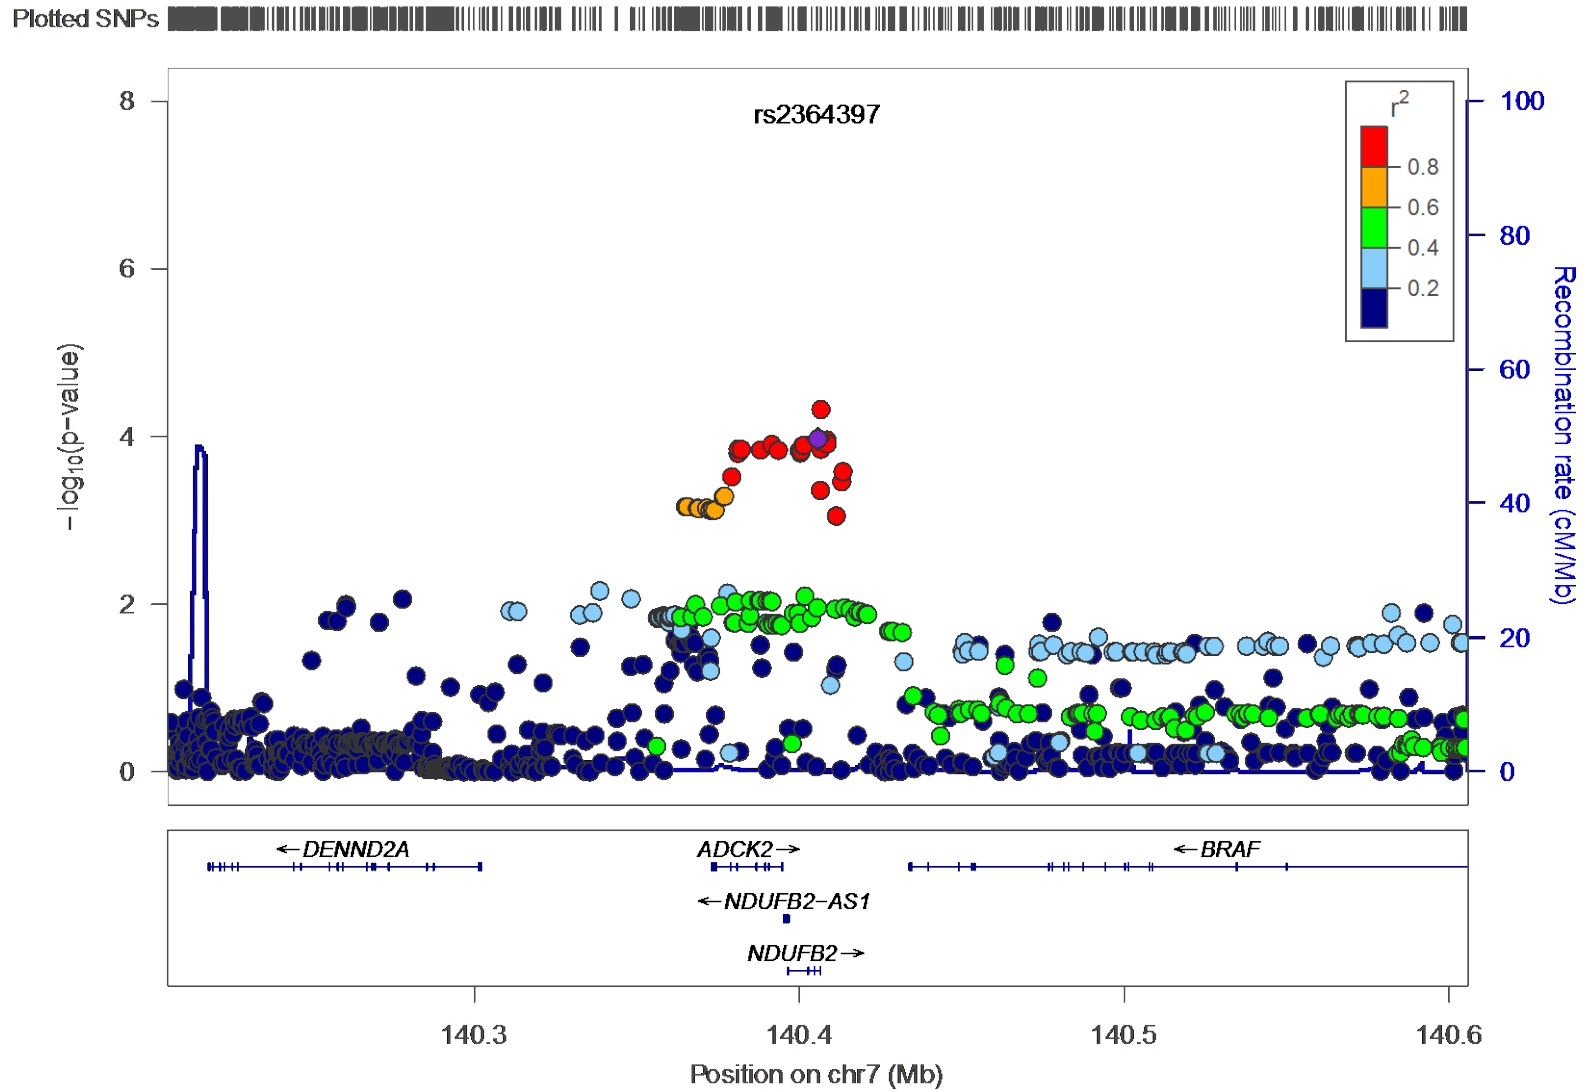

Plotted SNPs

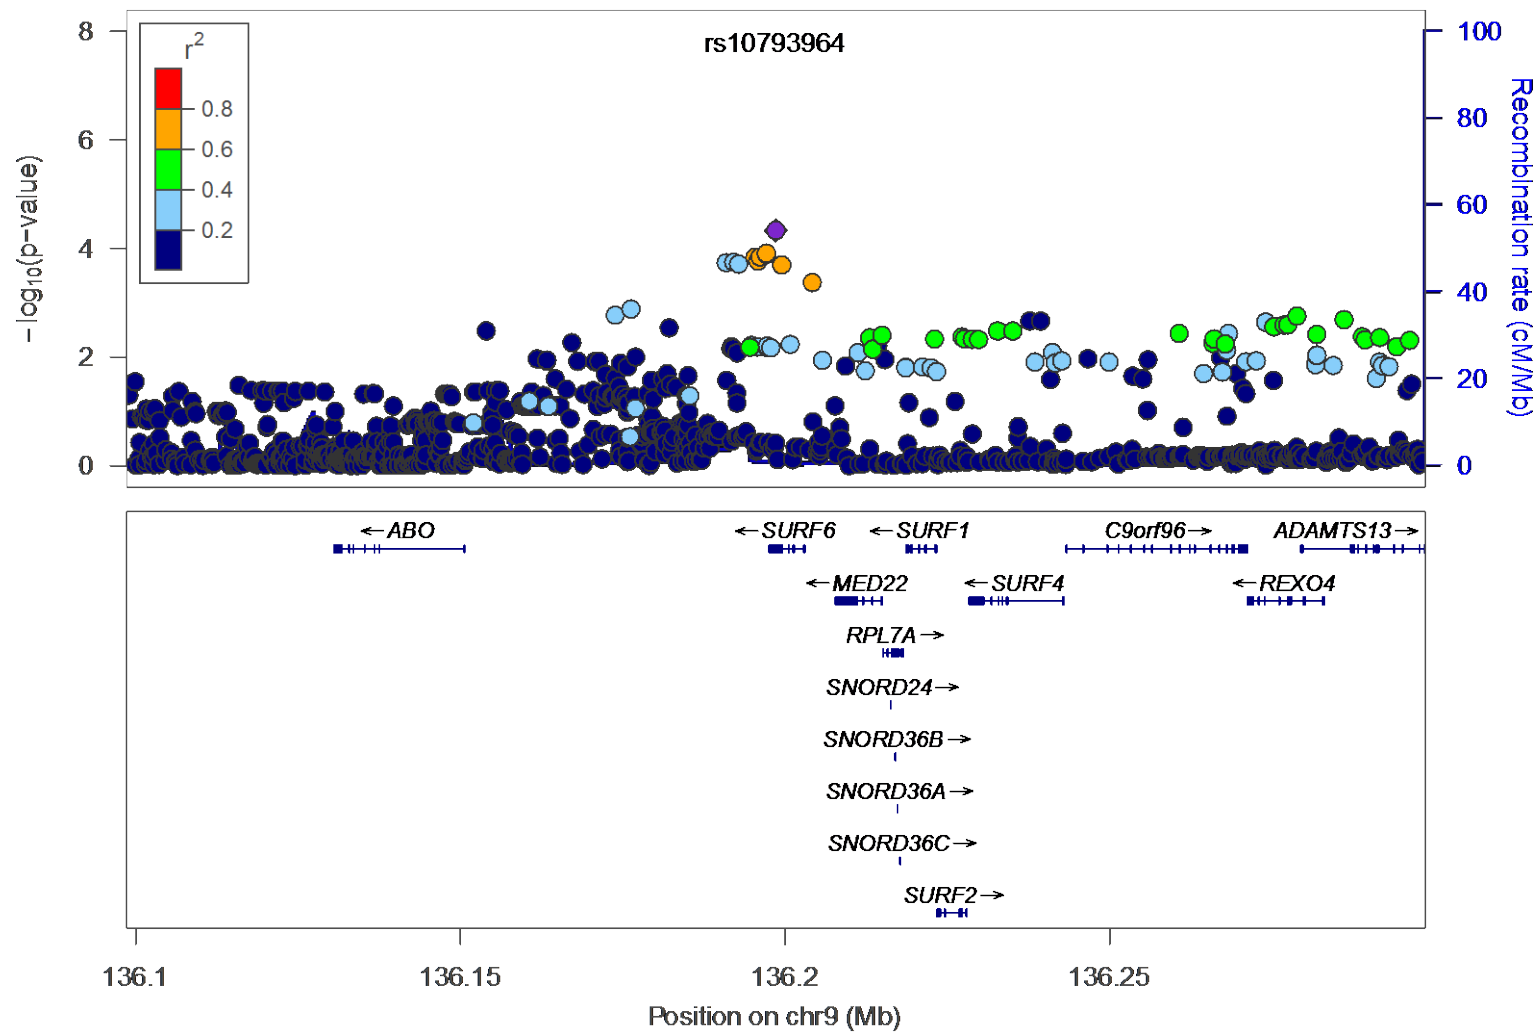

Plotted SNPs

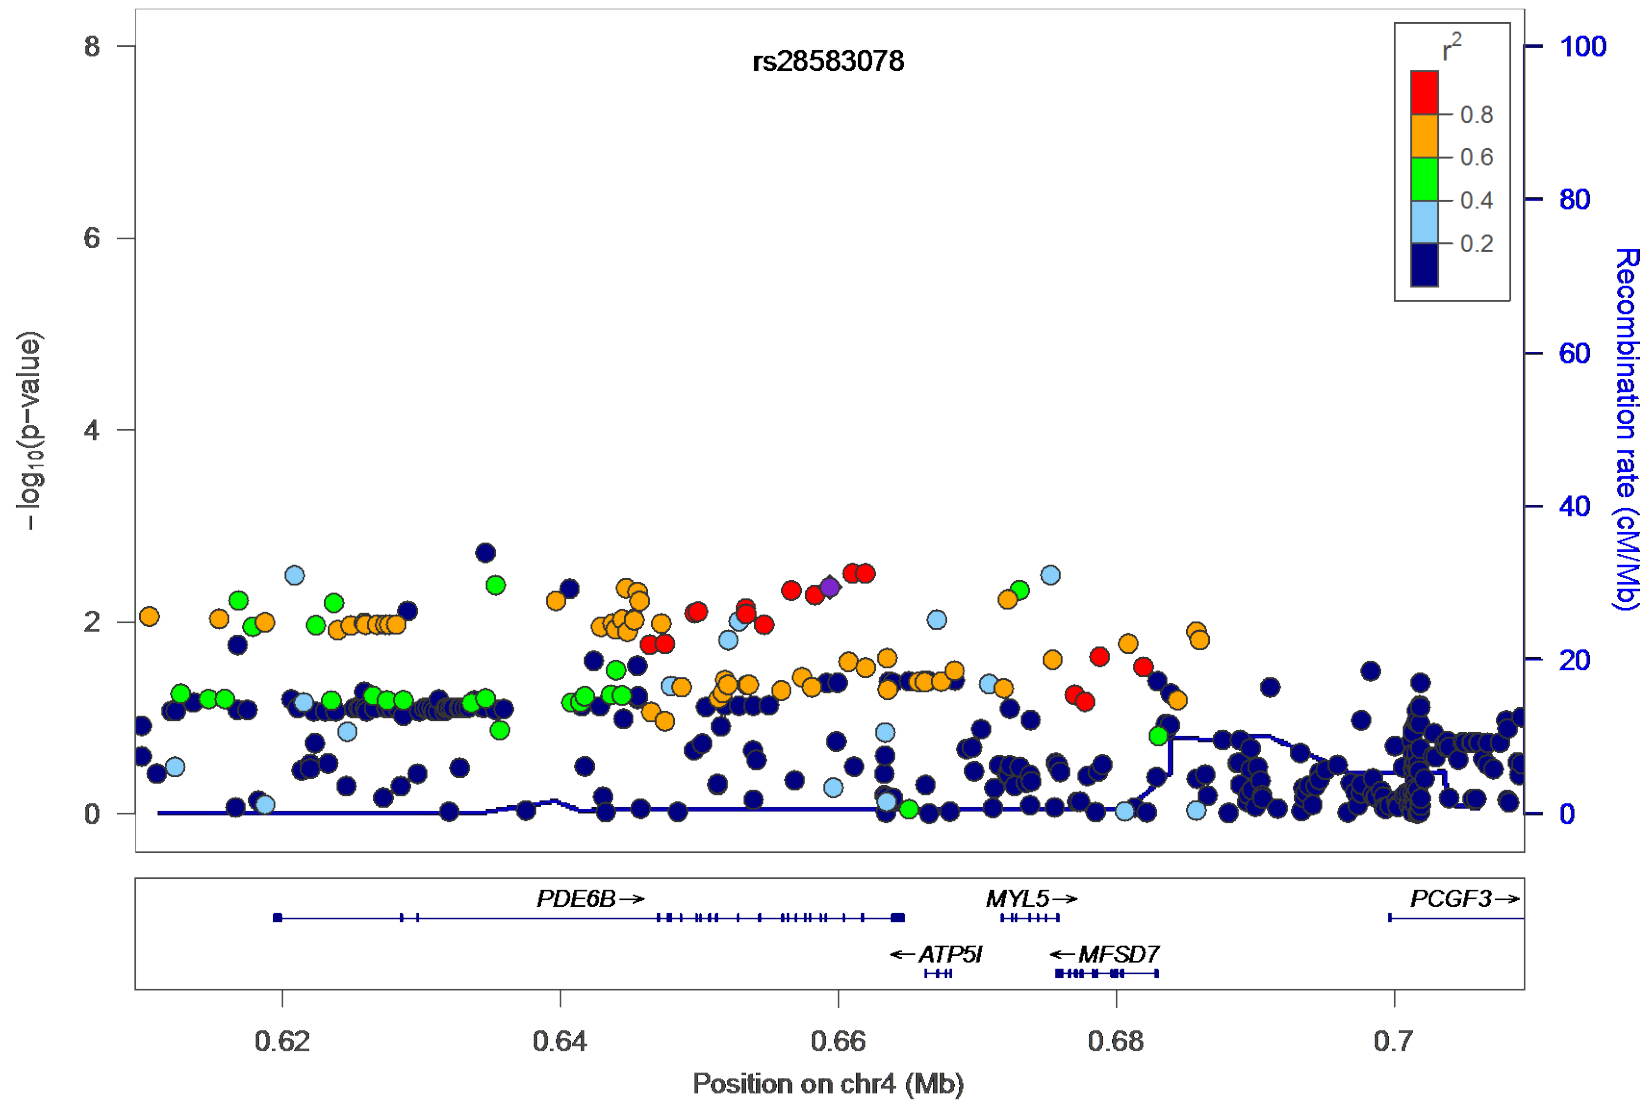

Plotted SNPs

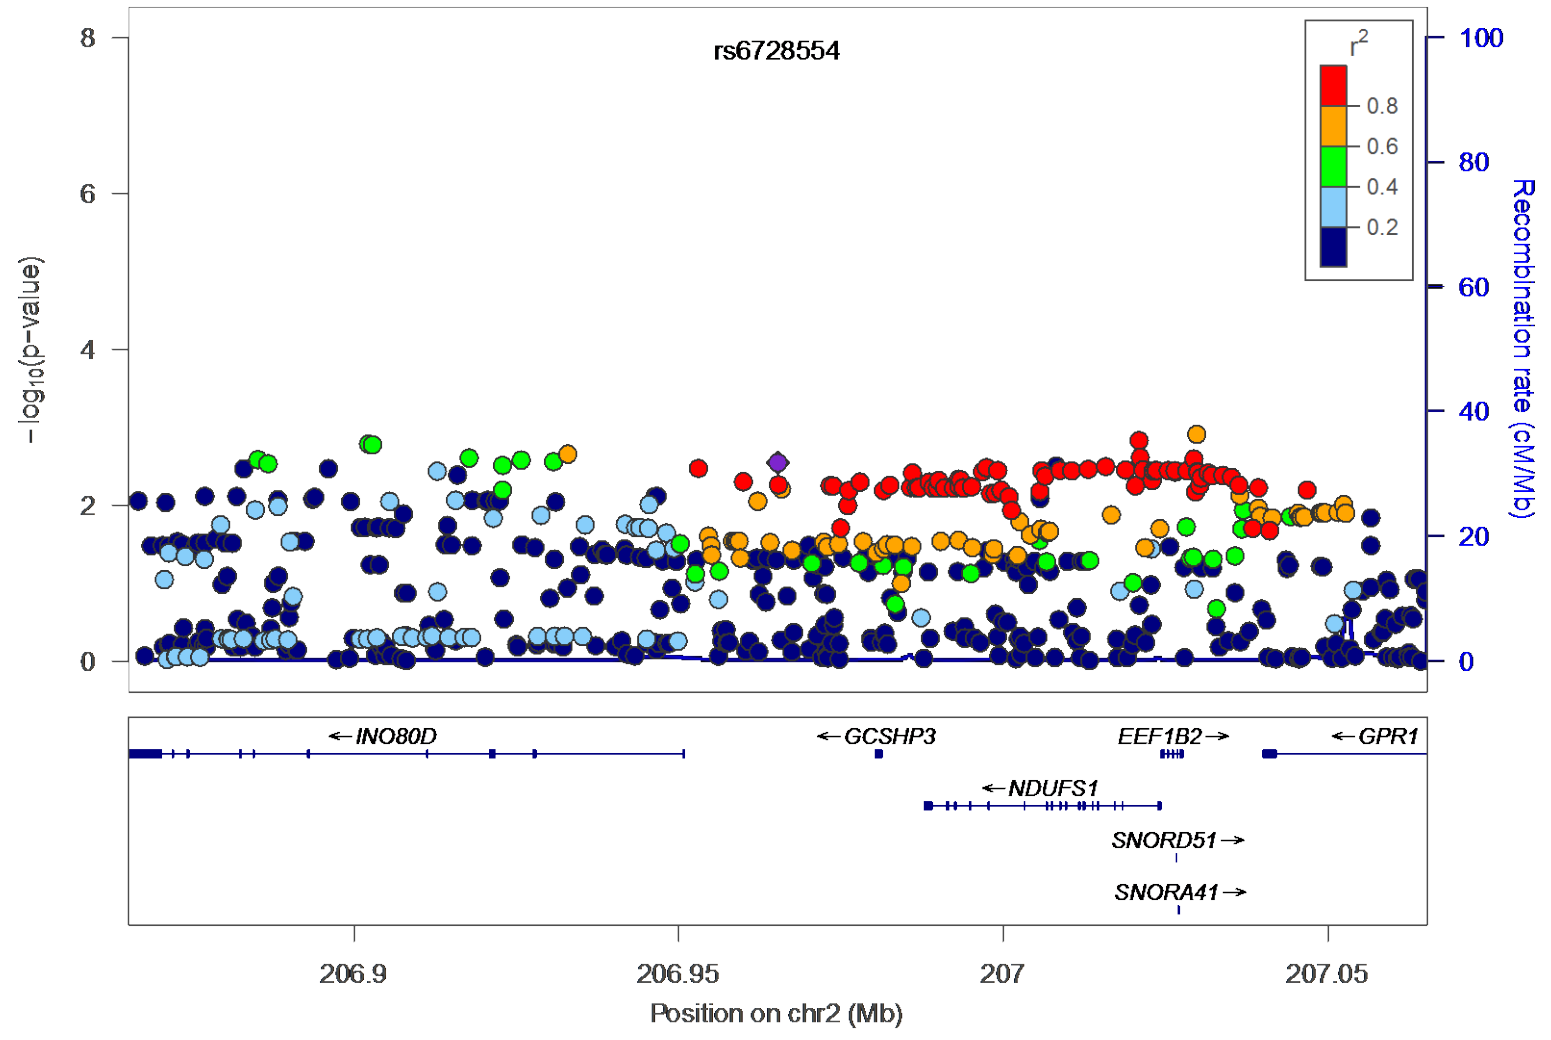

Plotted SNPs

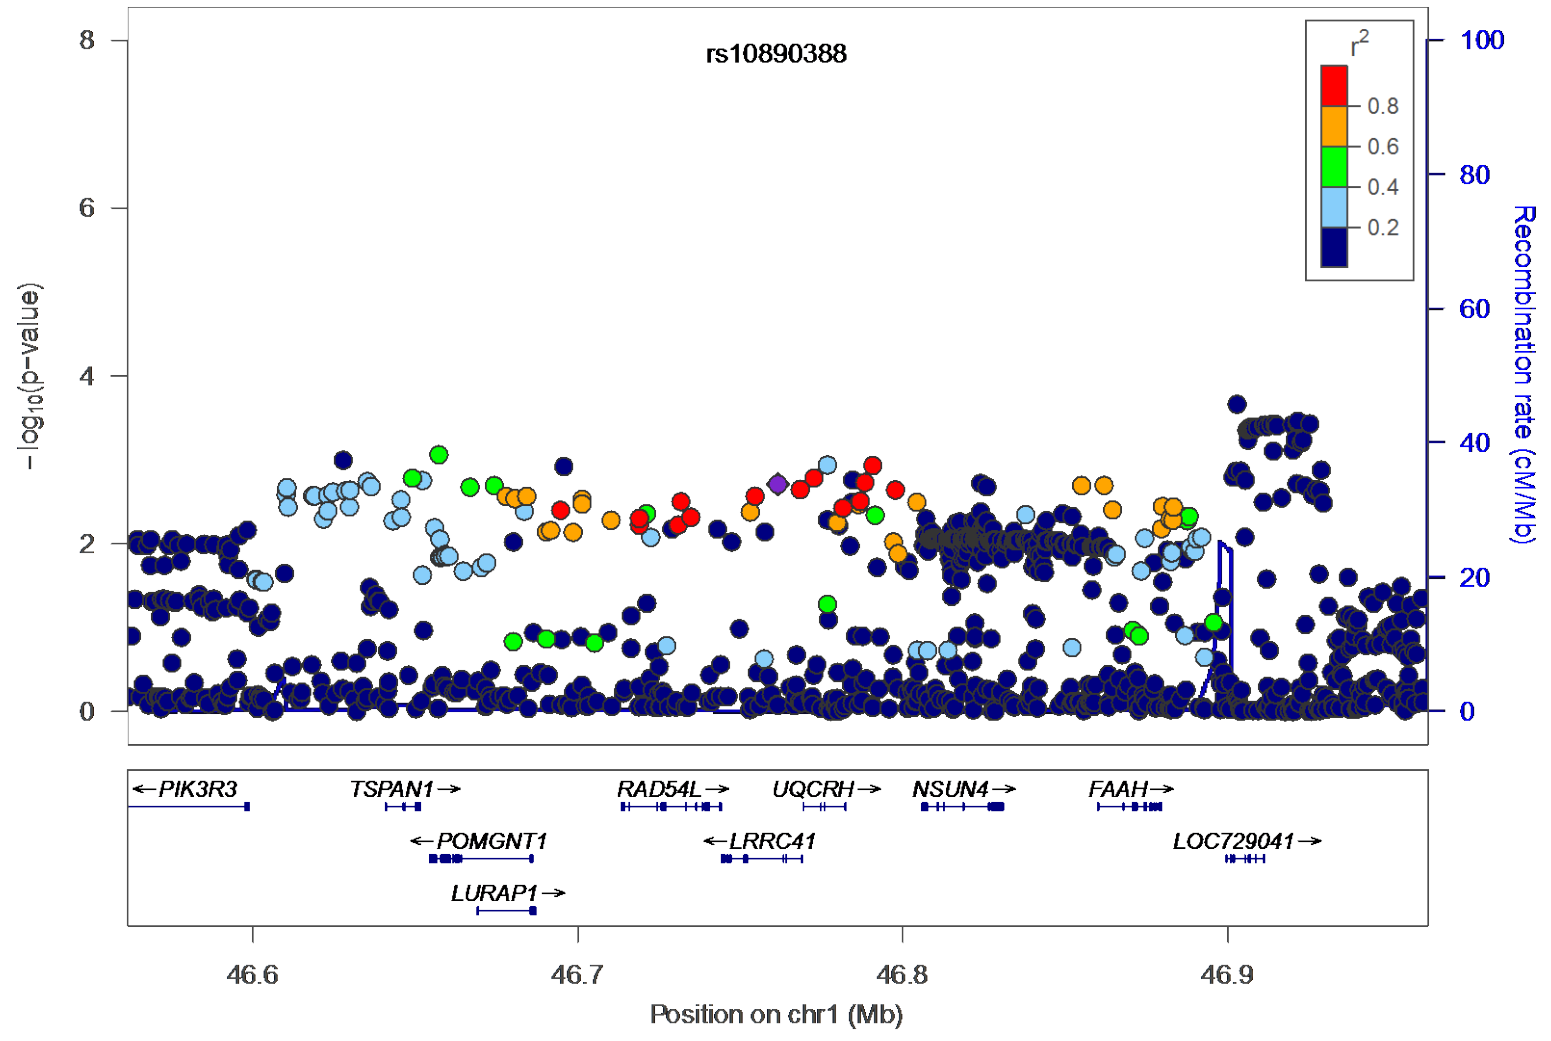

Supplement: supp_WNL.0000000000002260_Figure_e-1.pdf [file supp_WNL.0000000000002260_Figure_e-1.pdf]
